# Supplementary material
Source: PubMed Central journal article supplement (PMC1924589)
Supplement: pnas_0703442104_1.pdf [file pnas_0703442104_1.pdf]

**Table 1. Radiocarbon dates from the lakes**

| Site             | Level depth,<br>cm b.s. | Substrate  | $^{13}\text{C}/^{12}\text{C}$ | Radiocarbon age B.P. | 2 Sigma calibrated age B.P.                  | Lab no.     |
|------------------|-------------------------|------------|-------------------------------|----------------------|----------------------------------------------|-------------|
| Ixtacyola Center |                         |            |                               |                      |                                              |             |
|                  | 0-10                    | Sediment   | -19.6                         | 101.3 ± 0.8 pMC      | —                                            | Beta-172847 |
|                  | 300                     | Sediment   | -19.0                         | 5510 ± 40            | 6390 to 6270                                 | Beta-152916 |
|                  | 300-310                 | Sediment   | -16.8                         | 5700 ± 40            | 6610 to 6590 and<br>6570 to 6400             | Beta-164557 |
|                  | 520-530                 | Pollen     | -25.0                         | 5110 ± 160           | 6270 to 5580                                 | Beta-164561 |
|                  | 520-530                 | Sediment   | -18.2                         | 6190 ± 40            | 7230 to 6980                                 | Beta-164558 |
|                  | 540-550                 | Sediment   | -20.2                         | 6340 ± 40            | 7320 to 7220                                 | Beta-167244 |
|                  | 540-550                 | Sediment   | -20.2                         | 7050 ± 210           | 8330 to 7500                                 | Beta-167244 |
|                  | 600-610                 | Sediment   | -21.5                         | 8210 ± 40            | 9290 to 9030                                 | Beta-167245 |
|                  | 620-630                 | Pollen     | -23.6                         | 6120 ± 40            | 7160 to 7110 and<br>7100 to 6880             | Beta-196250 |
|                  | 640-650                 | Sediment   | -20.5                         | 9770 ± 50            | 11230 to 11140                               | Beta-167246 |
|                  | 675-680                 | Sediment   | -18.0                         | 9860 ± 50            | 11290 to 11180                               | Beta-152915 |
|                  | 725-745                 | Sediment   | -21.1                         | 11110 ± 80           | 13370 to 13270 and<br>13210 to 12890         | Beta-161408 |
| Ixtacyola Edge   |                         |            |                               |                      |                                              |             |
|                  | Pozo Sur 410            | Sediment   | -17.0                         | 7560 ± 40            | 8410 to 8330                                 | Beta-164560 |
|                  | Pozo Sur 420-430        | Pollen     | —                             | 6290 ± 40            | 7280 to 7170                                 | Beta-199286 |
|                  | Pozo Sur 430-440        | Sediment   | -15.1                         | 9390 ± 50            | 10720 to 10500                               | Beta-190111 |
|                  | Pozo N-1 290-300        | Sediment   | -17.9                         | 5450 ± 50            | 6310 to 6180                                 | Beta-188990 |
|                  | Pozo N-1, 440-450       | Sediment   | -16.3                         | 7070 ± 40            | 7960 to 7800                                 | Beta-164559 |
|                  | Pozo N-1, 490-500       | Sediment   | -16.3                         | 7900 ± 50            | 8990 to 8580                                 | Beta-164556 |
|                  | Pozo N-3 280-290        | Sediment   | -16.4                         | 5400 ± 100           | 6400 to 5930                                 | Beta-187495 |
| Ixtapa           |                         |            |                               |                      |                                              |             |
|                  | 843-860                 | Phytoliths | -25.0                         | 14090 ± 60           | 17260 to 16510                               | Beta-190110 |
|                  | 500-510                 | Phytoliths | -25.0                         | 10850 ± 50           | 13,100 to 13,080 and<br>13,020 to 12,810 and | Beta-190109 |

|         |          |       |           |  |                |             |
|---------|----------|-------|-----------|--|----------------|-------------|
|         |          |       |           |  | 12730 to 12650 |             |
| 190-200 | Sediment | -15.7 | 2240 ± 40 |  | 2340 to 2140   | Beta-188986 |
| 440-450 | Sediment | -18.1 | 5050 ± 40 |  | 5910 to 5670   | Beta-187494 |
| 640-650 | Sediment | -16.5 | 8300 ± 60 |  | 9470 to 9120   | Beta-188987 |

#### Tuxpan

|                    |                  |       |             |  |                                      |             |
|--------------------|------------------|-------|-------------|--|--------------------------------------|-------------|
| Core 1, 10         | Sediment         | -19.3 | 1010 ± 30   |  | 960 to 910 (AD 990-1040)             | Beta-144637 |
| Core 1, 113-114    | Sediment         | -23.5 | 1360 ± 60   |  | 1350 to 1175 (AD 600-775)            | Beta-135027 |
| Core 1, 223        | Sediment         | -19.4 | 1740 ± 40   |  | 1725 to 1545 (AD 225-405)            | Beta-135028 |
| Core 2, 430-431    | Pollen           | -26.5 | 2210 ± 40   |  | 2330 to 2120                         | Beta-194683 |
| Core 2, 440-450    | Sediment         | -22.0 | 2840 ± 60   |  | 3140 to 2790                         | Beta-135029 |
| Core 5, 99.5-110.5 | Sediment         | -18.6 | 1400 ± 40   |  | 1350 to 1270 (AD 600-680)            | Beta-210887 |
| Core 5, 572-573    | Sediment         | -23.9 | 2800 ± 40   |  | 2980 to 2790                         | Beta-210886 |
| Core 5, 570-575    | Pollen           | -     | 2610 ± 40   |  | 2780 to 2730                         | Beta-216367 |
| Core 5, 595-605    | Pollen           | -26.9 | 2680 ± 40   |  | 2850 to 2750                         | Beta-221301 |
| Edge, 150-160      | Sediment         | -13.8 | 3820 ± 40   |  | 4380 to 4090                         | Beta-195842 |
| Edge, 280-290      | Phytoliths       | -     | 10630 ± 300 |  | 13190 to 11550 and<br>11490 to 11430 | Beta-195843 |
| Edge, 280-290      | Sediment (Humin) | -12.6 | 4160 ± 50   |  | 4840 to 4530                         | Beta-219779 |
| Edge, 300-310      | Phytoliths       | -25.0 | 8860 ± 250  |  | 10560 to 9420                        | Beta-194681 |
| Edge, 310-320      | Sediment         | -16.6 | 5110 ± 40   |  | 5930 to 5740                         | Beta-152918 |

#### Chaucles

|         |                  |       |           |  |              |             |
|---------|------------------|-------|-----------|--|--------------|-------------|
| 190-200 | Pollen           | -19.7 | 1500 ± 40 |  | 1500 to 1310 | Beta-221670 |
| 240-250 | Sediment (Humin) | -22.7 | 3100 ± 50 |  | 3400 to 3210 | Beta-219778 |
| 240-250 | Sediment         | -15.9 | 3530 ± 60 |  | 3970 to 3650 | Beta-188988 |

All dates except Beta-187495 and 187494 are AMS determinations. The edge holes at Ixtacyola called Pozo Sur and Pozo Norte have parallel records, with bedrock at a depth of 7–7.5 m b.s. that is overlain by 2 to 3 meters of sediments consisting of light to medium

grey mottled clays containing sands and gravels, and showing increasing oxidation with depth. These sediments were deposited before the edges of the basin were inundated by rising water levels, further indicating that during its earliest history the basin held little water or was completely dry. At 4.5 m (Pozo Sur) and 5 m (Pozo Norte), sediments change to a black silty clay indicative of permanent standing water. A date of  $6290 \pm 40$  B.P. on pollen grains was obtained from a depth of 4.2 - 4.3 m at Pozo Sur.
